# Supplementary material for: A comparative study on the electron transfer reaction (ETR) of surfactant cobalt(iii) complexes of aliphatic/aromatic ligands in micro heterogeneous media: a thermodynamic approach
Source: Royal Society of Chemistry journal article supplement (doi:10.1039/c5ra02829a), 2015-01-01
Supplement: c5ra02829a1.pdf [file c5ra02829a1.pdf]

### Supplementary Informations

#### Figure Captions

SI Fig. 1 Plot of  $k$  against complex ion for Cis-[Co(dpq)<sub>2</sub>(C<sub>12</sub>H<sub>25</sub>NH<sub>2</sub>)<sub>2</sub>](ClO<sub>4</sub>)<sub>3</sub> under various temperatures; Cis-[Co(dpq)<sub>2</sub>(C<sub>12</sub>H<sub>25</sub>NH<sub>2</sub>)<sub>2</sub>](ClO<sub>4</sub>)<sub>3</sub> = 4 x 10<sup>-4</sup> mol dm<sup>-3</sup>,  $\mu$  = 1.0 mol dm<sup>-3</sup>, [Fe<sup>2+</sup>] = 0.01 mol dm<sup>-3</sup>

SI Fig. 2 Plot of  $k$  against complex ion for Cis-[Co(dpqc)<sub>2</sub>(C<sub>12</sub>H<sub>25</sub>NH<sub>2</sub>)<sub>2</sub>](ClO<sub>4</sub>)<sub>3</sub> under various temperatures; Cis-[Co(dpqc)<sub>2</sub>(C<sub>12</sub>H<sub>25</sub>NH<sub>2</sub>)<sub>2</sub>](ClO<sub>4</sub>)<sub>3</sub> = 4 x 10<sup>-4</sup> mol dm<sup>-3</sup>,  $\mu$  = 1.0 mol dm<sup>-3</sup>, [Fe<sup>2+</sup>] = 0.01 mol dm<sup>-3</sup>

SI Fig. 3 Plot of  $k$  against [β-CD] for Cis-[Co(dpq)<sub>2</sub>(C<sub>12</sub>H<sub>25</sub>NH<sub>2</sub>)<sub>2</sub>](ClO<sub>4</sub>)<sub>3</sub> at various temperatures; Cis-[Co(dpq)<sub>2</sub>(C<sub>12</sub>H<sub>25</sub>NH<sub>2</sub>)<sub>2</sub>](ClO<sub>4</sub>)<sub>3</sub> = 4 x 10<sup>-4</sup> mol dm<sup>-3</sup>,  $\mu$  = 1.0 mol dm<sup>-3</sup>, [Fe<sup>2+</sup>] = 0.01 mol dm<sup>-3</sup>

SI Fig. 4 Plot of  $k$  against [β-CD] for Cis-[Co(dpqc)<sub>2</sub>(C<sub>12</sub>H<sub>25</sub>NH<sub>2</sub>)<sub>2</sub>](ClO<sub>4</sub>)<sub>3</sub> at various temperatures; Cis-[Co(dpqc)<sub>2</sub>(C<sub>12</sub>H<sub>25</sub>NH<sub>2</sub>)<sub>2</sub>](ClO<sub>4</sub>)<sub>3</sub> = 4 x 10<sup>-4</sup> mol dm<sup>-3</sup>,  $\mu$  = 1.0 mol dm<sup>-3</sup>, [Fe<sup>2+</sup>] = 0.01 mol dm<sup>-3</sup>

SI Fig. 5 Eyring plot for Cis-[Co(dpq)<sub>2</sub>(C<sub>12</sub>H<sub>25</sub>NH<sub>2</sub>)<sub>2</sub>](ClO<sub>4</sub>)<sub>3</sub> in aqueous medium. [Complex] = 4 x 10<sup>-4</sup> mol dm<sup>-3</sup>; [Fe<sup>2+</sup>] = 0.01 mol dm<sup>-3</sup>; [ $\mu$ ] = 1.0 mol dm<sup>-3</sup>.

SI Fig. 6 Eyring plot for Cis-[Co(dpqc)<sub>2</sub>(C<sub>12</sub>H<sub>25</sub>NH<sub>2</sub>)<sub>2</sub>](ClO<sub>4</sub>)<sub>3</sub> in aqueous medium. [Complex] = 4 x 10<sup>-4</sup> mol dm<sup>-3</sup>; [Fe<sup>2+</sup>] = 0.01 mol dm<sup>-3</sup>; [ $\mu$ ] = 1.0 mol dm<sup>-3</sup>.

SI Fig. 7 Eyring plot for Cis-[Co(dpq)<sub>2</sub>(C<sub>12</sub>H<sub>25</sub>NH<sub>2</sub>)<sub>2</sub>](ClO<sub>4</sub>)<sub>3</sub> in [β-CD] medium. [Complex] = 4 x 10<sup>-4</sup> mol dm<sup>-3</sup>; [Fe<sup>2+</sup>] = 0.01 mol dm<sup>-3</sup>; [ $\mu$ ] = 1.0 mol dm<sup>-3</sup>, [β-CD] = 1.8 x 10<sup>-3</sup>.

SI Fig. 8 Eyring plot for Cis-[Co(dpqc)<sub>2</sub>(C<sub>12</sub>H<sub>25</sub>NH<sub>2</sub>)<sub>2</sub>](ClO<sub>4</sub>)<sub>3</sub> in [β-CD] medium. [Complex] = 4 x 10<sup>-4</sup> mol dm<sup>-3</sup>; [Fe<sup>2+</sup>] = 0.01 mol dm<sup>-3</sup>; [ $\mu$ ] = 1.0 mol dm<sup>-3</sup>, [β-CD] = 1.8 x 10<sup>-3</sup>.

SI Fig. 9 Isokinetic plot of the activation parameters for the reduction of Cis-[Co(dpq)<sub>2</sub>(C<sub>12</sub>H<sub>25</sub>NH<sub>2</sub>)<sub>2</sub>](ClO<sub>4</sub>)<sub>3</sub> by ion(II) in aqueous solutions. [Complex] = 4 x 10<sup>-4</sup> mol dm<sup>-3</sup>; [Fe<sup>2+</sup>] = 0.01 mol dm<sup>-3</sup>; [ $\mu$ ] = 1.0 mol dm<sup>-3</sup>.

SI Fig. 10 Isokinetic plot of the activation parameters for the reduction of Cis-[Co(dpqc)<sub>2</sub>(C<sub>12</sub>H<sub>25</sub>NH<sub>2</sub>)<sub>2</sub>](ClO<sub>4</sub>)<sub>3</sub> by ion(II) in aqueous solutions. [Complex] = 4 x 10<sup>-4</sup> mol dm<sup>-3</sup>; [Fe<sup>2+</sup>] = 0.01 mol dm<sup>-3</sup>; [ $\mu$ ] = 1.0 mol dm<sup>-3</sup>.

SI Fig. 11 Isokinetic plot of the activation parameters for the reduction of Cis-[Co(dpq)<sub>2</sub>(C<sub>12</sub>H<sub>25</sub>NH<sub>2</sub>)<sub>2</sub>](ClO<sub>4</sub>)<sub>3</sub> by ion(II) in β-cyclodextrin medium. [Complex] = 4 x 10<sup>-4</sup> mol dm<sup>-3</sup>; [Fe<sup>2+</sup>] = 0.01 mol dm<sup>-3</sup>; [ $\mu$ ] = 1.0 mol dm<sup>-3</sup>.

SI Fig. 12 Isokinetic plot of the activation parameters for the reduction of Cis-[Co(dpqc)<sub>2</sub>(C<sub>12</sub>H<sub>25</sub>NH<sub>2</sub>)<sub>2</sub>](ClO<sub>4</sub>)<sub>3</sub> by ion(II) in β-cyclodextrin medium. [Complex] = 4 x 10<sup>-4</sup> mol dm<sup>-3</sup>; [Fe<sup>2+</sup>] = 0.01 mol dm<sup>-3</sup>; [ $\mu$ ] = 1.0 mol dm<sup>-3</sup>.

#### Table Captions

SI Table 1. Second-order rate constants for the reduction of cobalt(III) complex ion by Fe<sup>2+</sup> in aqueous solutions under various temperatures. Cis-[Co(dpq)<sub>2</sub>(C<sub>12</sub>H<sub>25</sub>NH<sub>2</sub>)<sub>2</sub>](ClO<sub>4</sub>)<sub>3</sub> = 4 x 10<sup>-4</sup> mol dm<sup>-3</sup>,  $\mu$  = 1.0 mol dm<sup>-3</sup>, [Fe<sup>2+</sup>] = 0.01 mol dm<sup>-3</sup>

SI Table 2. Second-order rate constants for the reduction of cobalt(III) complex ion by Fe<sup>2+</sup> in aqueous solutions under various temperatures. Cis-[Co(dpqc)<sub>2</sub>(C<sub>12</sub>H<sub>25</sub>NH<sub>2</sub>)<sub>2</sub>](ClO<sub>4</sub>)<sub>3</sub> = 4 x 10<sup>-4</sup> mol dm<sup>-3</sup>,  $\mu$  = 1.0 mol dm<sup>-3</sup>, [Fe<sup>2+</sup>] = 0.01 mol dm<sup>-3</sup>

SI Table 3. Second-order rate constants for the reduction of cobalt(III) complex ion by  $\text{Fe}^{2+}$  in the presence of  $\beta$ -cyclodextrin under various temperatures.  $\text{Cis-}[\text{Co}(\text{dpq})_2(\text{C}_{12}\text{H}_{25}\text{NH}_2)_2](\text{ClO}_4)_3 = 4 \times 10^{-4} \text{ mol dm}^{-3}$ ,  $\mu = 1.0 \text{ mol dm}^{-3}$ ,  $[\text{Fe}^{2+}] = 0.01 \text{ mol dm}^{-3}$

SI Table 4. Second-order rate constants for the reduction of cobalt(III) complex ion by  $\text{Fe}^{2+}$  in the presence of  $\beta$ -cyclodextrin under various temperatures.  $\text{Cis-}[\text{Co}(\text{dpqc})_2(\text{C}_{12}\text{H}_{25}\text{NH}_2)_2](\text{ClO}_4)_3 = 4 \times 10^{-4} \text{ mol dm}^{-3}$ ,  $\mu = 1.0 \text{ mol dm}^{-3}$ ,  $[\text{Fe}^{2+}] = 0.01 \text{ mol dm}^{-3}$

SI Table 5. Activation parameters for the reduction of  $\text{Cis-}[\text{Co}(\text{dpq})_2(\text{C}_{12}\text{H}_{25}\text{NH}_2)_2](\text{ClO}_4)_3$ ,  $\mu = 1.0 \text{ mol dm}^{-3}$  in micelles medium

SI Table 6. Activation parameters for the reduction of  $\text{Cis-}[\text{Co}(\text{dpqc})_2(\text{C}_{12}\text{H}_{25}\text{NH}_2)_2](\text{ClO}_4)_3$ ,  $\mu = 1.0 \text{ mol dm}^{-3}$  in micelles medium

SI Table 7. Activation parameters for the reduction of  $\text{Cis-}[\text{Co}(\text{dpq})_2(\text{C}_{12}\text{H}_{25}\text{NH}_2)_2](\text{ClO}_4)_3$ ,  $\mu = 1.0 \text{ mol dm}^{-3}$  in  $\beta$ -CD medium

SI Table 8. Activation parameters for the reduction of  $\text{Cis-}[\text{Co}(\text{dpqc})_2(\text{C}_{12}\text{H}_{25}\text{NH}_2)_2](\text{ClO}_4)_3$ ,  $\mu = 1.0 \text{ mol dm}^{-3}$  in  $\beta$ -CD medium

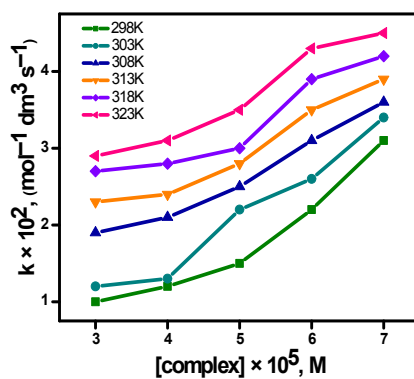

SI Fig. 1

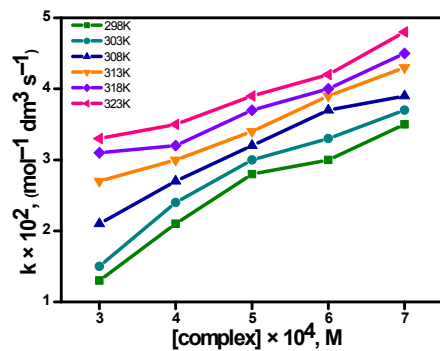

SI Fig. 2

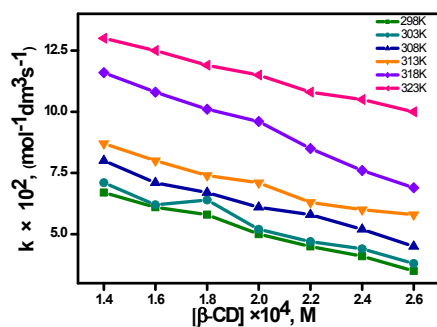

SI Fig. 3

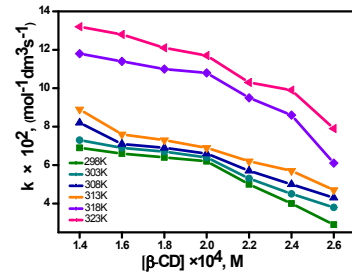

SI Fig. 4

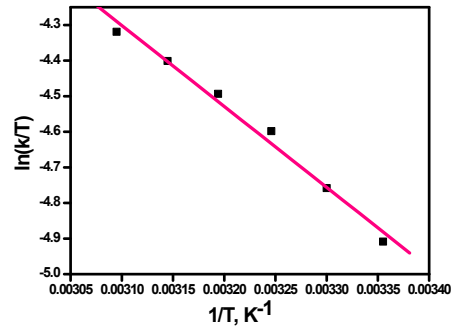

SI Fig. 5

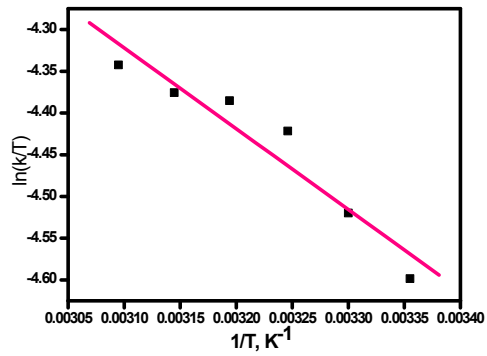

SI Fig. 6

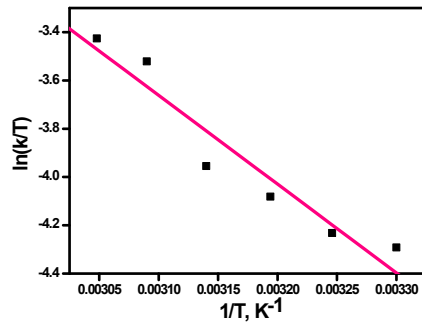

SI Fig. 7

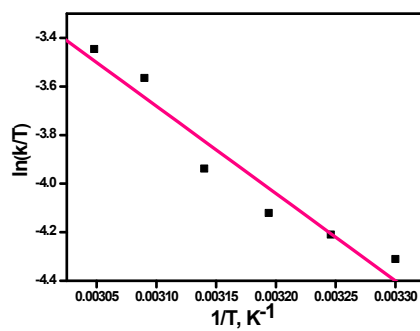

SI Fig. 8

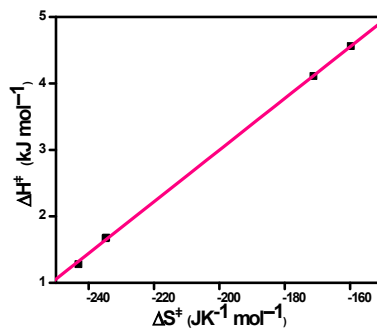

SI Fig. 9

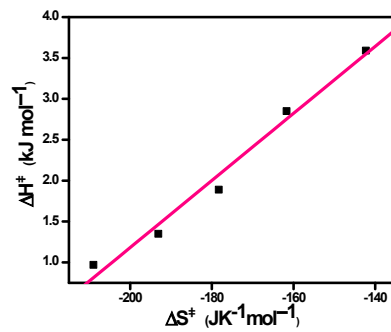

SI Fig. 10

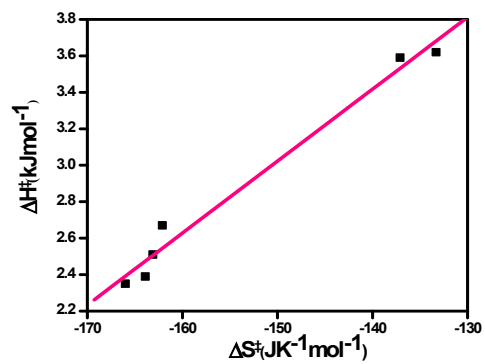

SI Fig. 11

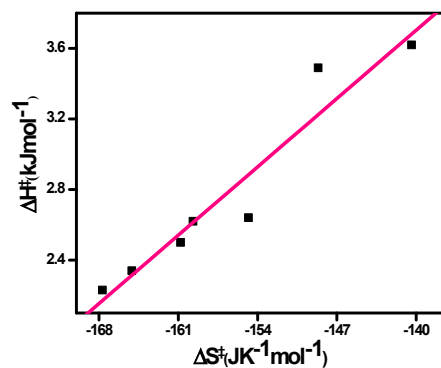

SI Fig. 12

SI Table 1

| [Complex]<br>$\times 10^4, \text{mol dm}^{-3}$ | $k \times 10^2, \text{dm}^3 \text{mol}^{-1} \text{s}^{-1}$ |      |      |      |      |     |
|------------------------------------------------|------------------------------------------------------------|------|------|------|------|-----|
|                                                | 298K                                                       | 303K | 308K | 313K | 318K | 23K |
| 3.0                                            | 1.0                                                        | 1.2  | 1.9  | 2.3  | 2.7  | 2.9 |
| 4.0                                            | 1.2                                                        | 1.3  | 2.1  | 2.4  | 2.8  | 3.1 |
| 5.0                                            | 1.5                                                        | 2.2  | 2.5  | 2.8  | 3.0  | 3.6 |
| 6.0                                            | 2.2                                                        | 3.1  | 3.4  | 3.5  | 3.9  | 4.5 |
| 7.0                                            | 3.1                                                        | 3.4  | 3.9  | 4.3  | 4.5  | 4.9 |

SI Table 2

| [Complex]<br>$\times 10^4, \text{mol dm}^{-3}$ | $k \times 10^2, \text{dm}^3 \text{mol}^{-1} \text{s}^{-1}$ |      |      |      |      |      |
|------------------------------------------------|------------------------------------------------------------|------|------|------|------|------|
|                                                | 298K                                                       | 303K | 308K | 313K | 318K | 323K |
| 3.0                                            | 1.6                                                        | 1.8  | 2.0  | 2.7  | 3.3  | 3.5  |
| 4.0                                            | 2.1                                                        | 2.4  | 2.4  | 3.0  | 3.5  | 3.9  |
| 5.0                                            | 2.8                                                        | 3.0  | 3.2  | 3.4  | 3.7  | 4.0  |
| 6.0                                            | 3.0                                                        | 3.3  | 3.3  | 3.9  | 4.0  | 4.4  |
| 7.0                                            | 3.8                                                        | 4.1  | 4.6  | 5.1  | 5.6  | 5.9  |

SI Table 3

| [ $\beta$ -cyclodextrin]<br>$\times 10^4, \text{mol dm}^{-3}$ | $k \times 10^2, \text{dm}^3 \text{mol}^{-1} \text{s}^{-1}$ |      |      |      |      |      |
|---------------------------------------------------------------|------------------------------------------------------------|------|------|------|------|------|
|                                                               | 298K                                                       | 303K | 308K | 313K | 318K | 323K |
| 1.4                                                           | 6.7                                                        | 7.1  | 8.0  | 8.7  | 11.6 | 13.0 |
| 1.6                                                           | 6.1                                                        | 6.2  | 7.1  | 8.0  | 10.8 | 12.5 |
| 1.8                                                           | 5.8                                                        | 6.4  | 6.7  | 7.4  | 10.1 | 11.9 |
| 2.0                                                           | 5.0                                                        | 5.2  | 6.1  | 7.1  | 9.6  | 11.5 |
| 2.2                                                           | 4.5                                                        | 4.7  | 5.8  | 6.3  | 8.5  | 11.2 |
| 2.4                                                           | 4.0                                                        | 4.4  | 5.2  | 6.0  | 7.6  | 10.5 |
| 2.6                                                           | 3.5                                                        | 3.8  | 4.5  | 5.8  | 6.9  | 10.0 |

SI Table 4

| [ $\beta$ -cyclodextrin]<br>$\times 10^4, \text{mol dm}^{-3}$ | $k \times 10^2, \text{dm}^3 \text{mol}^{-1} \text{s}^{-1}$ |      |      |      |      |      |
|---------------------------------------------------------------|------------------------------------------------------------|------|------|------|------|------|
|                                                               | 298K                                                       | 303K | 308K | 313K | 318K | 323K |
| 1.4                                                           | 6.9                                                        | 7.3  | 8.2  | 8.9  | 11.8 | 13.2 |
| 1.6                                                           | 6.6                                                        | 6.9  | 7.1  | 7.6  | 11.4 | 12.8 |
| 1.8                                                           | 6.4                                                        | 6.7  | 6.9  | 7.3  | 11.0 | 12.2 |
| 2.0                                                           | 6.2                                                        | 6.4  | 6.6  | 6.9  | 10.8 | 11.5 |
| 2.2                                                           | 5.0                                                        | 5.3  | 5.7  | 6.2  | 9.5  | 11.4 |
| 2.4                                                           | 4.2                                                        | 4.5  | 5.0  | 5.7  | 8.6  | 11.0 |
| 2.6                                                           | 2.9                                                        | 3.8  | 4.3  | 4.7  | 6.1  | 10.5 |

SI Table 5

| [Complex] $\times 10^4,$<br>$\text{mol dm}^{-3}$ | $\Delta H^\ddagger \text{ kJmol}^{-1}$ | $\Delta S^\ddagger \text{ JK}^{-1}$ |
|--------------------------------------------------|----------------------------------------|-------------------------------------|
| 3.0                                              | 1.11                                   | -204.5                              |
| 4.0                                              | 2.27                                   | -174.7                              |
| 5.0                                              | 2.61                                   | -167.8                              |
| 6.0                                              | 3.70                                   | -140.4                              |
| 7.0                                              | 4.08                                   | -130.9                              |

SI Table 6

| [Complex] $\times 10^4$ ,<br>mol dm <sup>-3</sup> | $\Delta H^\ddagger$ kJmol <sup>-1</sup> | $\Delta S^\ddagger$ JK <sup>-1</sup> |
|---------------------------------------------------|-----------------------------------------|--------------------------------------|
| 3.0                                               | 0.97                                    | -209.0                               |
| 4.0                                               | 1.35                                    | -193.1                               |
| 5.0                                               | 1.89                                    | -178.3                               |
| 6.0                                               | 2.85                                    | -161.7                               |
| 7.0                                               | 3.59                                    | -142.3                               |

SI Table 7

| [ $\beta$ -cyclodextrin] $\times 10^3$ ,<br>mol dm <sup>-3</sup> | $\Delta H^\ddagger$ kJmol <sup>-1</sup> | $\Delta S^\ddagger$ JK <sup>-1</sup> |
|------------------------------------------------------------------|-----------------------------------------|--------------------------------------|
| 1.4                                                              | 2.35                                    | -166.0                               |
| 1.6                                                              | 2.39                                    | -163.9                               |
| 1.8                                                              | 2.51                                    | -163.1                               |
| 2.0                                                              | 2.67                                    | -162.1                               |
| 2.2                                                              | 3.59                                    | -137.1                               |
| 2.4                                                              | 3.62                                    | -133.3                               |



SI Table 8

| $[\beta\text{-cyclodextrin}] \times 10^3,$<br>$\text{mol dm}^{-3}$ | $\Delta H^\ddagger$ $\text{kJmol}^{-1}$ | $\Delta S^\ddagger$ $\text{JK}^{-1}$ |
|--------------------------------------------------------------------|-----------------------------------------|--------------------------------------|
| 1.4                                                                | 2.23                                    | -167.7                               |
| 1.6                                                                | 2.34                                    | -165.1                               |
| 1.8                                                                | 2.50                                    | -160.8                               |
| 2.0                                                                | 2.62                                    | -159.7                               |
| 2.2                                                                | 2.64                                    | -154.8                               |
| 2.4                                                                | 3.49                                    | -148.7                               |
| 2.6                                                                | 3.62                                    | -140.4                               |
